# Supplementary material for: microRNA-222-Mediated VHL Downregulation Facilitates Retinoblastoma Chemoresistance by Increasing HIF1α Expression
Source: PubMed Central journal article supplement — Invest Ophthalmol Vis Sci. 2020 Aug 5;61(10):9. doi: 10.1167/iovs.61.10.9 (PMC7441340; doi:10.1167/iovs.61.10.9), 2020-08-05
Supplement: iovs-61-10-9_s002.pdf [file iovs-61-10-9_s002.pdf]

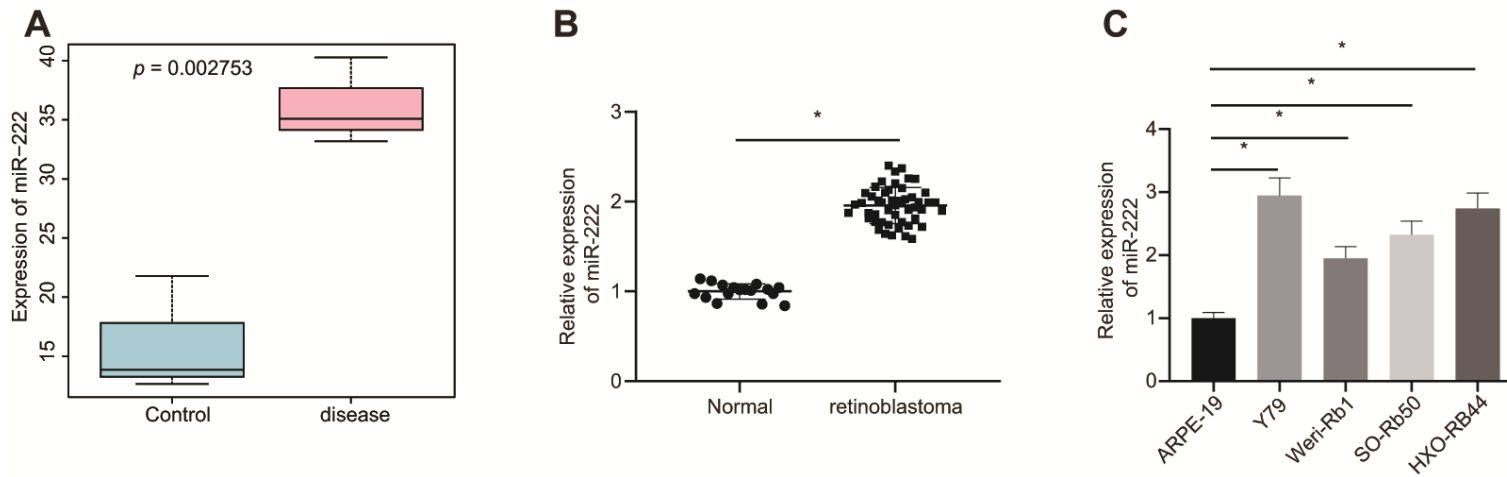

**Supplementary figure 1** miR-222 expression is elevated in RB tissues and cells. A, box plot was drawn based on the miR-222 expression data in the GSE41321 expression profile, the blue box on the left indicating the expression of the normal samples, and the red box on the right indicating the expression of the RB samples. B, Normalized expression of miR-222 in retinal tissues of RB patients (n = 50) and normal retinal tissues (n = 17) detected by RT-qPCR assay. C, Normalized expression of miR-222 in normal human retinal epithelial cell line ARPE-19 (n = 17) and RB cell lines (n = 50) (Y79, Weri-Rb1, SO-Rb50, HXO-RB44) measured by RT-qPCR assay. In panel B, \* $p < 0.05$  vs. normal retinal tissues. In panel C, \* $p < 0.05$  vs. ARPE-19 cell line. Measurement data were expressed as mean  $\pm$  standard deviation. Data comparison between two groups were performed by unpaired t-test.
