# Supplementary material for: microRNA-222-Mediated VHL Downregulation Facilitates Retinoblastoma Chemoresistance by Increasing HIF1α Expression
Source: PubMed Central journal article supplement — Invest Ophthalmol Vis Sci. 2020 Aug 5;61(10):9. doi: 10.1167/iovs.61.10.9 (PMC7441340; doi:10.1167/iovs.61.10.9), 2020-08-05
Supplement: iovs-61-10-9_s003.pdf [file iovs-61-10-9_s003.pdf]

**A**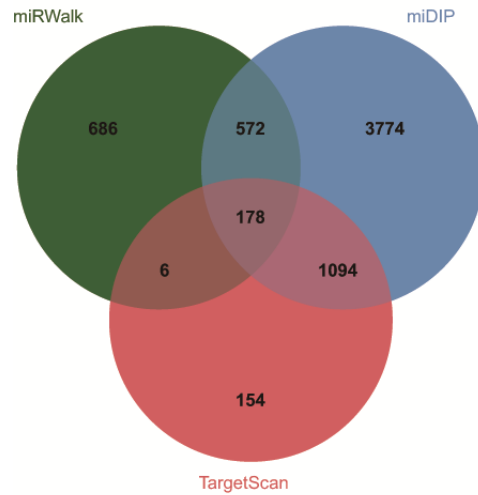**B**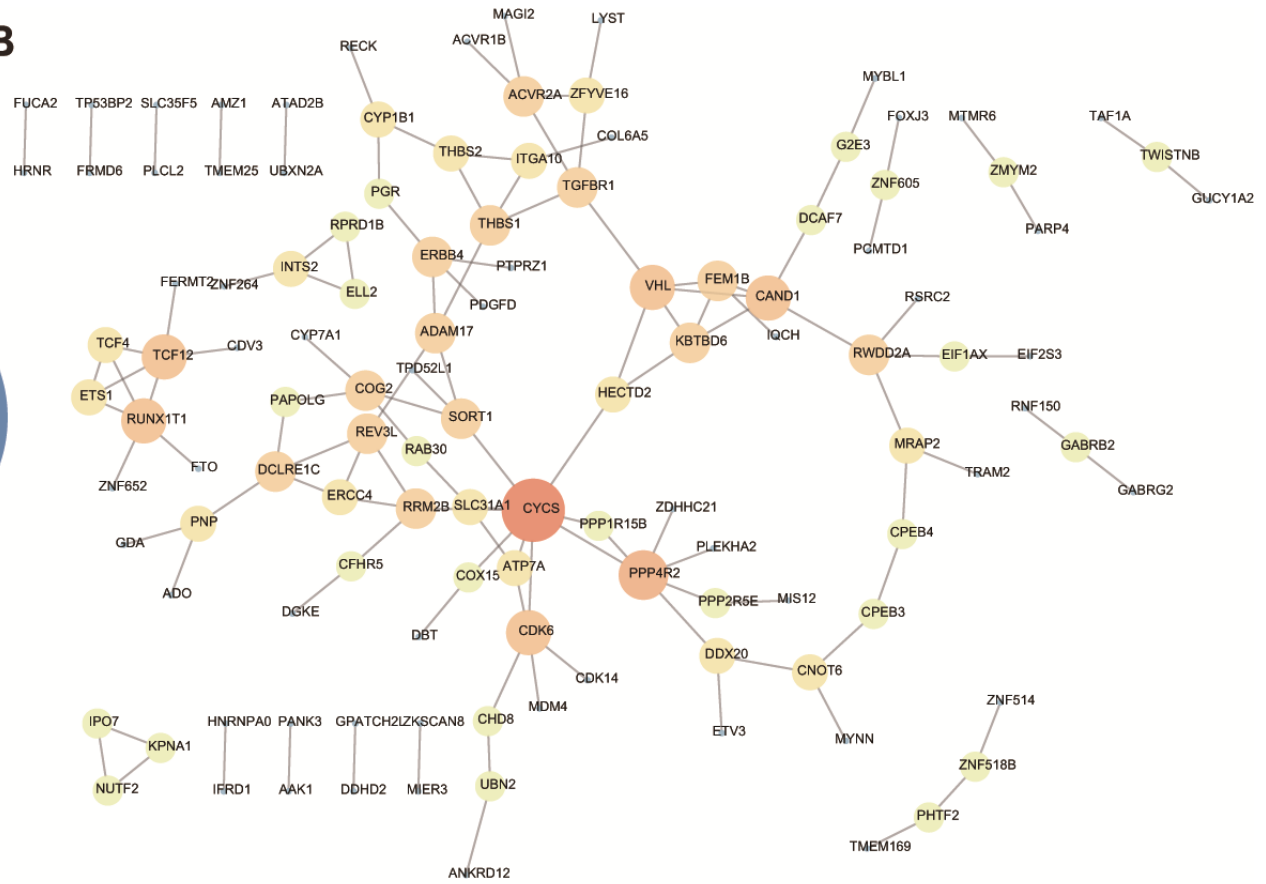**C**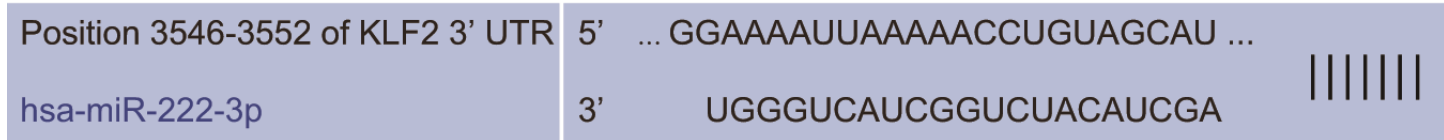

**Supplementary figure 2** VHL is predicted to be a target gene of miR-222 through bioinformatic analyses. A, Venn diagram of downstream target genes of miR-222 predicted on the databases miRWalk, miDIP and TargetScan. 178 genes were obtained by identification of gene-gene intersection. B: PPI network of 178 genes constructed by online analysis tool String. Darker red color reflected higher core level of the gene in the PPI network. Darker blue color reflected lower core level. C, bindings sites between VHL and miR-222.
